# Supplementary material
Source: ML conference proceedings conference paper supplement (https://proceedings.mlr.press/v119/wang20r.html)
Supplement: Supplementary file [file wang20r-supp.pdf]

---

# WHEN DEEP DENOISING MEETS ITERATIVE PHASE RETRIEVAL

## SUPPLEMENTARY MATERIAL

---

In this supplementary material, we provide proofs on the proximal operators used in our algorithms and show how ADMM (Boyd et al., 2011) with indicator functions coincides with Hybrid-Input-Output (HIO) (Fienup, 1982) and Hybrid-Projection-Reflection (HPR) (Bauschke et al., 2003).

### 1 Proximal operators

We consider two proximal operators for Fourier phase retrieval: the squared error of Fourier amplitudes and regularization by denoising (RED) coupled with additional object-space constraints.

1.  $R(x) = \bar{I}_{\mathcal{C}}(x) + \frac{\lambda}{2} \langle x, x - D(x) \rangle$

Let  $D$  be the denoiser used in RED and  $\mathcal{C}$  be the set of signals satisfying the additional constraints provided, where we assume that the denoiser  $D$  is (locally) homogeneous with symmetric Jacobian (Romano et al., 2017) and  $\mathcal{C}$  is a convex set. For any  $\tau > 0$ , if  $v^+ = \text{prox}_{\tau R}(v)$ , then the first-order optimality condition gives

$$\begin{aligned}
 v^+ &= \underset{x \in \mathbb{R}^n}{\text{armin}} \tau R(x) + \frac{1}{2} \|v - x\|^2 \\
 &\Rightarrow \tau(\partial \bar{I}_{\mathcal{C}}(v^+) + \lambda(v^+ - D(v^+))) + v^+ - v = 0 \\
 &\Leftrightarrow v^+ = \left( I + \frac{\tau}{1 + \lambda\tau} \partial \bar{I}_{\mathcal{C}} \right)^{-1} \left( \frac{v + \lambda\tau D(v^+)}{1 + \lambda\tau} \right) \\
 &\Leftrightarrow v^+ = \Pi_{\mathcal{C}} \left( \frac{v + \lambda\tau D(v^+)}{1 + \lambda\tau} \right)
 \end{aligned} \tag{S1}$$

where  $\partial \bar{I}_{\mathcal{C}}$  is the subgradient of the indicator function and the last equality follows by noting that the resolvent of  $\partial \bar{I}_{\mathcal{C}}$  is the projection  $\Pi_{\mathcal{C}}$  onto  $\mathcal{C}$  (Ryu & Boyd, 2016).

2.  $f(z) = \frac{1}{2} \|y - |Fz|\|^2$

Let  $F$  be the (normalized) discrete Fourier transform and  $y$  be the measured Fourier amplitude, which is non-negative. For simplicity, we consider 1D signals only (the conclusion holds for any dimension). Using the overhead symbol  $\hat{\cdot}$  to denote the signal after Fourier transform, Parseval's theorem gives

$$\begin{aligned}
 x^+ &= \text{prox}_{\tau f}(x) = \underset{z}{\text{argmin}} \frac{\tau}{2} \|y - |Fz|\|_2^2 + \frac{1}{2} \|x - z\|^2 \\
 &\Leftrightarrow \widehat{x^+} = \underset{\hat{z}}{\text{argmin}} \frac{\tau}{2} \|y - |\hat{z}|\|_2^2 + \frac{1}{2} \|\hat{x} - \hat{z}\|^2 \\
 &= \underset{\hat{z}}{\text{argmin}} \frac{1}{2} \sum_k \tau (|\hat{z}[k]| - y[k])^2 + |\hat{z}[k] - \hat{x}[k]|^2
 \end{aligned} \tag{S2}$$

It was noticed in (Wen et al., 2012) that the solution is

$$\widehat{x^+}[k] = \frac{\tau}{\tau + 1} y[k] \frac{\hat{x}[k]}{|\hat{x}[k]|} + \frac{1}{\tau + 1} \hat{x}[k] \quad \forall k \tag{S3}$$

which follows from the first-order optimality condition. Here, we provide an alternative proof that this solution is the global minimum.

We start by using the triangle inequality  $|\hat{z}[k] - \hat{x}[k]|^2 \geq (|\hat{z}[k]| - |\hat{x}[k]|)^2$  to give the lower bound

$$\min_{\hat{z}} \sum_k \tau (|\hat{z}[k]| - y[k])^2 + |\hat{z}[k] - \hat{x}[k]|^2 \geq \min_{\hat{z}} \sum_k \tau (|\hat{z}[k]| - y[k])^2 + (|\hat{z}[k]| - |\hat{x}[k]|)^2 \quad (\text{S4})$$

Equality between the right- and left-hand sides is achieved when

$$\Re(\overline{\hat{z}[k]} \hat{x}[k]) = |\hat{z}[k]| |\hat{x}[k]| \quad \forall k \quad (\text{S5})$$

i.e., when the complex phase  $\angle \hat{z}[k] = \angle \hat{x}[k]$  ( $\angle \hat{z}[k]$  can be arbitrary if  $\hat{x}[k] = 0$ ). As the right-hand side is convex on  $|\hat{z}[k]|$ , the minimum is achieved when

$$|\hat{z}[k]| = \frac{\tau y[k] + |\hat{x}[k]|}{\tau + 1} \quad \forall k \quad (\text{S6})$$

as  $y[k], |\hat{x}[k]| \geq 0$ . Therefore, if  $x^+$  minimizes (S2), then for all  $k$ ,

$$\begin{aligned} \widehat{x^+}[k] &= \frac{\tau y[k] + |\hat{x}[k]|}{\tau + 1} \exp(i \angle \hat{x}[k]) \\ &= \frac{\tau}{\tau + 1} y[k] \exp(i \angle \hat{x}[k]) + \frac{1}{\tau + 1} |\hat{x}[k]| \exp(i \angle \hat{x}[k]) \\ &= \frac{\tau}{\tau + 1} y[k] \frac{\hat{x}[k]}{|\hat{x}[k]|} + \frac{1}{\tau + 1} \hat{x}[k] \end{aligned} \quad (\text{S7})$$

Performing an inverse Fourier transform gives (26) in the main text:

$$x^+ = \frac{\tau}{1 + \tau} \Pi_{\mathcal{M}}(x) + \frac{1}{\tau + 1} x \quad (\text{S8})$$

## 2 Equivalence between ADMM and HIO/HPR

Let  $x_0$  be the ground truth and  $S$  and  $\tilde{S}$  be the support for  $x_0$  and the extended support for padded  $\tilde{x}_0 = P_{mn}x_0$ , respectively.

If there is additional information about the signal support, e.g. an estimation  $\gamma$  such that  $S \subseteq \gamma$ , then the relation  $\tilde{S} \subseteq \tilde{\gamma}$  holds for the extended support as well. For example, if we use the same vectorization as in the main text, such that

$$\tilde{x} = P_{mn}x = \begin{bmatrix} x \\ 0_{m-n} \end{bmatrix} \quad (\text{S9})$$

then we will have  $S = \tilde{S}$  and  $\gamma = \tilde{\gamma}$ . Define subset  $\mathcal{S}$  for the signals satisfying the given support constraint,

$$\mathcal{S} := \{x \in \mathbb{C}^n \mid x_i = 0 \forall i \notin \gamma\} \quad (\text{S10})$$

The projection onto  $\mathcal{S}$  is

$$\Pi_{\mathcal{S}}(x)_i = \begin{cases} x_i & \text{if } i \in \gamma \\ 0 & \text{otherwise} \end{cases} \quad (\text{S11})$$

and similarly for  $\tilde{\mathcal{S}} := \{x \in \mathbb{C}^m \mid x_i = 0 \forall i \notin \tilde{\gamma}\}$  on the extended support.

According to (Bauschke et al., 2002), HIO with  $\beta = 1$  can be written as

$$\tilde{x}^{k+1} = \Pi_{\tilde{\mathcal{S}}}(2\Pi_{\mathcal{M}}(\tilde{x}^k) - \tilde{x}^k) - \Pi_{\mathcal{M}}(\tilde{x}^k) + \tilde{x}^k \quad (\text{S12})$$

We now relate this to the optimization of FPR with the support constraint

$$\begin{aligned} &\underset{x \in \mathbb{C}^n, z \in \mathbb{C}^m}{\text{minimize}} \quad \bar{I}_{\mathcal{M}}(z) + \bar{I}_{\mathcal{S}}(x) \\ &\text{subject to} \quad z = O_{mn}x \end{aligned} \quad (\text{S13})$$

With  $\tilde{x} = O_{mn}x$ , this can be rewritten as

$$\begin{aligned} &\underset{\tilde{x}, z \in \mathbb{C}^m}{\text{minimize}} \quad \bar{I}_{\mathcal{M}}(z) + \bar{I}_{\tilde{\mathcal{S}}}(\tilde{x}) \\ &\text{subject to} \quad z = \tilde{x} \end{aligned} \quad (\text{S14})$$

for which ADMM gives the update rule as

$$\begin{aligned}\tilde{x}^{k+1} &= \Pi_{\mathcal{S}}(z^k + u^k) \\ z^{k+1} &= \Pi_{\mathcal{M}}(\tilde{x}^{k+1} - u^k) \\ u^{k+1} &= u^k + z^{k+1} - \tilde{x}^{k+1}\end{aligned}\tag{S15}$$

As in (Wen et al., 2012), the updates for  $m^{k+1} = \tilde{x}^{k+1} - u^k$  are given by

$$\begin{aligned}m^{k+2} &= \tilde{x}^{k+2} - u^{k+1} \\ &= \Pi_{\mathcal{S}}(2\Pi_{\mathcal{M}}(m^{k+1}) - m^{k+1}) - \Pi_{\mathcal{M}}(m^{k+1}) + m^{k+1}\end{aligned}\tag{S16}$$

which coincides with (S12).

Next, we denote  $\mathcal{S}_+$  as the set containing signals which not only satisfy the support constraint but also have non-negative elements in the real part:

$$\mathcal{S}_+ := \{x \in \mathbb{C}^n \mid x_i = 0 \ \forall i \notin \gamma \text{ and } \Re(x_i) \geq 0 \ \forall i\}\tag{S17}$$

The projection onto  $\mathcal{S}_+$  is

$$\Pi_{\mathcal{S}_+}(x) = \Pi_{Re_+}(\Pi_{\mathcal{S}}(x))\tag{S18}$$

with  $\Pi_{Re_+}$  being the element-wise projection

$$\Pi_{Re_+}(x)_i = \begin{cases} x_i & \text{if } \Re(x_i) \geq 0 \\ i\Im(x_i) & \text{otherwise} \end{cases}\tag{S19}$$

Changing  $\mathcal{S}$  to  $\mathcal{S}_+$  in (S14) and repeating (S15) to (S16) gives the recursion for  $m^{k+1}$  as

$$m^{k+2} = \Pi_{\mathcal{S}_+}(2\Pi_{\mathcal{M}}(m^{k+1}) - m^{k+1}) - \Pi_{\mathcal{M}}(m^{k+1}) + m^{k+1}\tag{S20}$$

which coincides with HPR with  $\beta = 1$  (Bauschke et al., 2003).

## References

- Bauschke, H. H., Combettes, P. L., and Luke, D. R. Phase retrieval, error reduction algorithm, and fienupt variants: a view from convex optimization. *J. Opt. Soc. Am. A*, 19(7):1334–1345, Jul 2002.
- Bauschke, H. H., Combettes, P. L., and Luke, D. R. Hybrid projection–reflection method for phase retrieval. *J. Opt. Soc. Am. A*, 20(6):1025–1034, Jun 2003.
- Boyd, S., Parikh, N., Chu, E., Peleato, B., and Eckstein, J. Distributed optimization and statistical learning via the alternating direction method of multipliers. *Foundations and Trends® in Machine Learning*, 3(1):1–122, 2011.
- Fienup, J. R. Phase retrieval algorithms: a comparison. *Appl. Opt.*, 21(15):2758–2769, Aug 1982.
- Romano, Y., Elad, M., and Milanfar, P. The little engine that could: Regularization by denoising (red). *SIAM Journal on Imaging Sciences*, 10(4):1804–1844, 2017.
- Ryu, E. K. and Boyd, S. Primer on monotone operator methods. *Appl. Comput. Math*, 15(1):3–43, 2016.
- Wen, Z., Yang, C., Liu, X., and Marchesini, S. Alternating direction methods for classical and ptychographic phase retrieval. *Inverse Problems*, 28(11):115010, oct 2012.
